# Supplementary material
Source: PubMed Central journal article supplement (PMC1458633)
Supplement: pnas_0511257103_1.pdf [file pnas_0511257103_1.pdf]

Core Sequences:

MOKF: CCA
EBOX: CAC, reverse GTC
TALE: GTC, reverse TGAC
MEIS: GACA

NPHS1-hs-pm

Fragment of sequence NT\_011196 extracted from pos. 8360548 - 8396430 on chromosome 19.
TGCACCTCCAG CCTGAGCAAC AGAGCAAGAC TATCTCAAGA AAAGAAAGAA AGAAAGAAAG 60
AGACTTGCCA AGGTGATGTA TCAGGGCAAG GAAGAGTCCG GGGCCAGCTT GGCTGCTCCC 120
CTGTGTAGCT GGGAGACCA CTTCCATCTGA CTTCCCGAGC TTCCCCAGCC TAAGCCAGCC 180
CCTGGGGTCA CGGAGGCTGG GGAGGCACCG AGGAACGCCG CTGGCATCTG CTGAGGGG 240
ATTTTATGCT CCAGCTGGGC CAGCTGGGAG GAGCCTGCTG GGCAGAGGCC AGAGCTGGGG 300
GCTCTGGAA GTACCTGGGG GAGGTTCAC TGTAAGAAAT AGCTCAAGCT GGGTCAGAGA 360
GCAGGGCTGA CTCTGCCAGT GCCTGCATCA GCCTCATCCG TCTCCTAGCC TCCTGGCCGT 420
CTGGACTCTG GGCTGCAGT CCTTCTTGAA AGGCTGTGAG TAGTGAGACA AGGAGCAGGA 480
GTGAGGGGTG GCAGGAGAGA AGATAGAGAT TGAGAGAGAG AGAGAGAGAG AGACAGAGAG 540
AGAGAGAGAG ACAGAGACAA AAGGAGAGAG AACGGCTTAG ACAAGAGAGAG AAGATGGAA 600
AGATAAAGAG ACTGGGGCAG GTGGCTCACG CCTGTAATCC CAACACTTGG GGAGGCCAAG 660
GTGGGGAGAT GGCTTGAAGG AAAGAGTCTG AGATCAACCT GGCCAACATA GTGAGACCCC 720
GTCTCTAAAA AAAAAAAAAA GAAAAAAAAA AGAAAAAGT TTTTAAAAAG 780
GACAGAGAAA GAGACTCAGA GATTGAGACT GAGAGCAAGA CAGAGAGAGA TACTCACAGG 840
GAAGAGGGGA AGAGGAAAAA GAGAAAGGGA GAGAGAGTAA GGAAGAGAT AAAAAAGAAA 900
AGCAGGTGGC AGAGACACAC AGAGAGGGAC CCACAGAAAG CCAGACAGAC GCAAGTGGCT 960
GGCAGCGGGC GCTGTGGGGG TCACAGTAGG GGGACCTGTG ATGCGCCCTG GGACCCAGCT 1020
CAGGGCTTCT CTCCTGCTCC TGGGGCTGCT GACTGAAGGT GAGTGGGATC CCAGCCTTGT 1080
ACCCAGCGCC AAGTGGCCCC

NPHS1-mm-pm

Fragment of sequence NW\_000310 extracted from pos. 3493071 - 3539836 on chromosome 7.
AGACACTCCA AATACGTCCA CAGATGAAAA TCGGCTCTCG TCTCCCCTGG AACACGCACA 60
CTCTGAAACC CATACCCACA GAAGTGGCTT CTCTCTGTCC CATACTCTCT TGGTTTAAACA 120
ACACACTCCT GCATATTTAC CAGCAGGGGT GGGGTACATG CCACAGTCTG GCCTGCAAA 180
AGCAAGGATG TCCTGGGGGG GGGGGTGTGA GCCTTTCCAC GCACACAGGC CTAGCTCTGC 240
GTTCATCTCT GAGCTGGAGA TGGCCCTGAT CAGAAATGCT CTCTGCGG CTTGGGTTCA 300
CCCCGGCTGG GGAGGCACCA AAGAATGTTC CTGGCATCTG CTGAGGGG ATTTCTAGTC 360
CCGGCTGGGC AGACTCAGGA AGGACTTGGG GGAAGCAGCA GAATGAGGAT TCACACTGGG 420
TCCAAGCAAT GCTCAGTGTCT GTGGCTGACT GCTTTGGGTT CGTGAACCTG CTGGACTTAG 480
AGCAGCGGCT GCTCTTTAG TACCTGTGAG TGGTTGAGG GGTGGTGATA GTAAAGAAAA 540
ACAGAGAGAA GAGAAGGGGG CATTTTTAA GTCTTTGAGG TTAGAGCTAG AGAAAGAATA 600
GTTAAGCGGG GAGAAAGGGG GAGAAAGGG CAGAAAAGGC GATGCCGGGA CAGAAAGACT 660
CGCAGCTCA CAGACAATGG TAGGAAGATA AGAGAAAGAA GGAAGGGAGG GAGGGAGGGA 720
GGGAAGAGAG AAGGGCGAGT TAGAAAAGAG TTGAAAAGAA AGAAAAGCAG GGCACACAGA 780
GAGAGGCTCA GGAAGACAG CAACAAACAA GCTGCTGGT ATGGGAGCTA AGGAAGCCAC 840
AGTCAAGACC CCGGGGCAA GCCCAGTGCA CAGAACTGTC CACTGTATTC CCCTGCTGCT 900
CGCGGGAATG CTGACCACAG GTGAGTGGAA TGTGGACTGT GTAGTGCACC GCTCACAAGT 960
GCCACCTAG GCTCTATTG TCAATCTCTT GTCTCTCCAG GCCTGGCCCA GTCCGAGCT 1020
CCCACCTAG CACCTCGAG CTCTCTGGCT CTATCTGAAA ACCTGACTGT GGTGGAAGGG 1080
TCGACAGTTA AGCTGTGGTG 1100

NPHS1-rn

Fragment of sequence NW\_043363 extracted from pos. 289244 - 340738 on chromosome 1.
TGTTTATCGG TGTCTGAGCT CACCAGGTT CTGCACACTG AGGCTGTGG ACACAGTCCT 60
ACTGACTGTC COGATGCTCT GTGTACACGA TATCAGACAC TCTAAGTGT TTCAATTGGC 120
TGTCACTTCC CTCTGGAAC CACGCTCTCT AAATCCACAC CCACACAGTA GGCTTCTCTC 180
TGCCCCACAC TCTCTCTTGT TAAAAACACA CTCGTGAATA TTCCACAGCA GAGGTGCCAT 240
GGAGAGAAG AGGGTACATG TCAATGATCT GGCTGCAAG AATAAGGATG TCAATGGGGG 300
AGGGTGTGT GTCCCTTCTA CCATACAGG CCTAGCTCTG GGTCCCTGAC TGAGCTGGGA 360
GATGGCCCTG GTCAGAAATG CTCTCCCTCG GACTCTGAG TCACTGGGGC TAGGGAGCCA 420
CCAAGGAATG CTCTGGCAT GTCCTGAGG GGGATTTCAT TGCCCGCTGG GCAGACTCAG 480
GAAGGACTTG GAGGAAGCAG CAAGTGTGAG TCAACCTGG TCCAAGAAAT GTTCCCATGC 540
TGTGCTGAC GCCTTTGGCT TTCTGGGTTT ATGGAAGTGC TGGACCCAGC ACAGCTGTGGT 600

ZO1(TJP1)-hs

Fragment of sequence NT\_010363 extracted from pos. 778614 - 910964 on chromosome 15.
TGAACGAGAG CAACGCTTCT GACCCTGCCG GAGCTCCTCG GAGATGAAAG CCATGACGGC 60
CCTTTCAGAA AATGCAATTC GCCTTCCGTG GGAACAACGC CGAGGCACGC GTTGCAGACC 120
GTTCCAGTGC TGTTTGCCCA GTGAAAGAAA CAACTGTCCG GTATCCGCTC TGCCGCGCTT 180
TCACAGACCT CTCATGCATG GGGCTCACCC CATGATGTGC GTGGCTTGTG GAGGAGCAAG 240
TGGACAAGTC TCTTAAAGAA AGCTTTGGTG CACAGCGGCT TTCTCCTTGG GGGCGCAATC 300
TGCCAGACTT TGGATAAAAA CAACAGGAAA GACTCGCACG GCAGCGGAAA CTGCTTCCA 360
AGTTACTTTG GTTACCCTGC TTTTCTTCC GCGCTTGGG TCGGGACCCC GGCCGCTCGT 420
CCCGCCCTCT CCCCAGCCGC GGCCCGCCGC CCTCCCGCCG TCGCTCGCCG TCGCCTCTGT 480
CAGCCCGGCC CCGCCGGGGG CGGSCATGCT CAGTGGGGCC GGCCGGGAGC TTTGCGTGGC 540

ZO1(TJP1)-mm

Fragment of sequence NW\_000327 extracted from pos. 4548652 - 4633797 on chromosome 7.
TACTCGTGT ATTAAAGCA GTCCGTTTGT CTTGAG CTTA CAGAACGCT TCTGTGTGTC 60
TTTAACAAA AACATATCTC CAATGGGGTA ACAGTGGCGA GACACATGCT GACAGTTGT 120
GTCATTTGTTA CTTGGCAGGC TAAAGAAAAC ACAGTGGGGT ATTGGCCAGG CCGACCTTAA 180
TTGTCACACT CTTCCGCTGG GCCCATCTGG GGTGTCTGGT TGAGAGAAA GTAGACAAAT 240
CTGTGTAGGG AGTCAAAAAG CTTTAGTACA CAGGAGTTTG GGTTCCTCCG GGTGGGGGT 300
GAATCGAAT TTCCGCGATC TGTGATAAAA ACAAAAAGAA TGGATCGCCG GGCAGCGGAA 360
ACCCGCTAGC AAGTAACCTG GGTAGCCGAG CTTTTCTCTC CGCCGGGGGG TCGGACCCGG 420
CCTGGCCCGC CCCTCCGCGG AGGCCCGCCG CCGCCCGGCT GGGCATGCTC AGTGCCCGGG 480
TCCGCGCAGT TTTGGCTGGC CCGCTGAGTT GCCCGCGCAG GCTCTGCCCG CCGACGGCAC 540
GTCTCTCGCG GCGCCGCGG TCCGGGGGA TTACGTGGCG GAGCAGGCTT TCGAGGAGAG 600

ZO1(TJP1)-rn

Fragment of sequence NW\_043379 extracted from pos. 156085-156725 on chromosome 1.
AAGGGGGCTT GGGATTATCT CTGGGTGCTG GTCCCCCTCA GTGTCCAGAT GTGACTCTGG 60
TTTATTCAG GCAGTCGGTT GTTCTTGGG CTTCTAGAAC GCTCTGTGTG TGCTTTAACC 120
AAAAACACAT CCAATGGGAT AACATGCCC AGACACTG TGACAGTGT CATTGTT 180
ACTTGGCAGG TTAAGAAAAA CACAGTCGGG TATTGGCCAG ACCGACCTTT CTGTCCACAT 240
TCCCTGCTGG GCCTGATCTG GGTGGCTGG CTGAAGAGGG AGTAGAAAAG TCTCTTAAG 300
GAGTCGAAAA GCTTTGTGAT ACAGAGTCTG GGGTCTCGG GGGCGAATTC TGCCGGATCT 360
TTGATAAAAA CAACACAGGAT GTGTCCGCGC GCAGCGGAAA CCGCCTAGCA AGTTACTTTG 420
GTAGCTGAGC TTTTCTTCC GCGCGGGGTG CGGACTGGA CTGGCCCGCC CCTCGGGGA 480
GGCCCGCCCC CGCCGCGCTG CCTGCTCA GTGCCGGGTG GTGCGGCTG 540
GCCTGAGTTG CCCGCGCAG CTCTGCCGC CGACGGCAG TCTCTCGCG CTGCGCGGCT 600
CCGGGAAGT TACGTGGCGG AGCAGGGT TTAGGAGAGC

CDH5-hs

Fragment of sequence NT\_010498 extracted from pos. 15121698-15122298 on chromosome 16.
CAAAGACATC ATFGGATCAC CACAGAAAAT CAAGCTCTGG GCTTAGGCTG ACCCCAGCTA 60
GATTTTGGG TCTTTTATC CCCAGCTGGG TGGACAAGCA GCTTAAACCC GCTGAGCCTC 120
AGCTTCCGG GCTATAAAAT GGGGGTATG ACTCCTGGC TTGACATTC AAGGAGGTT 180
AAATGTGATG CTGAGCCAAA GTGACGCCAC AGCCAGGCTC TTAGCGGTTG CTGTTCTAG 240
AGTCCCAAGC CTGAGCCCGG GAGTGGGGT TCAAGTGGG TGCCCAAGCC AGGTCACAGT 300
GCCAGCCCTG TGTGGAGACA GCATCCCGG GCAGCCAGG CCGCCACCG CAGGCTGTG 360
CTATCTGAGC CAGCCAGCCT CACTCAAAG GAACAAATAC AGGAAACCTT CCGAGGGGGA 420
ATGTTGGGCA GGCCAGCTGG AAAACTGAAA GGGAGGAGG CACAGCCCTC CTGCCACG 480
GGGTGTGGCT CCCTCCCAA GACGCTCGG TGACAGGCTC CACAGAGCT CACTCACGCT 540
CAGCCCTGGA CGACAGGCA GTCCAACGGA ACAGAAACAT CCCTAGGCC ACAGGCAGG 600

CDH5-mm

Fragment of sequence NW\_000349 extracted from pos. 31814143-31814743 on chromosome 8.
CTACAGATC GCCACGAAA GCGGCTCTG TGGAGAAGCT GAGGTAGCTG GTTTCTGTCT 60
TGGTTCATC TGTCCAGGA GGAACAAGT ACTTAGAC CACTAAGCTC CTGCTTCTGT 120
AACTGTAAAG TGGGGGATG TACTCTGCC CCGCTGGC TCCCAGGAT GGCTGAATGC TGTGGCAGAA 180
GCTTAGAGCC CCCACAGCTA CCCATAGGCT CAGACTCCT CCGATGAGAC CTAGAATTGA 240
GGTATGAGTT GAATACCCCA GGCAGTCCA ACAGTTCAC GGGCCCAAGC TGACCAAGCT 300
GAGGCGCCCC ACCGTAGGCG TGTGCTATCT GCAGGCAAGT CACAAAGGAA CATAACAGG 360
AAAGATCCC GAGGGGAAGT GGGCCAGGC CAGTTGGAAA ACCTGCTCCC CTCCAGGCT 420
GCGTGTGGCT CCTCTTCCC CTCTAGGCG ATCAACTGT GCTCTCCACA AAGCTCGCC 480
CTGGACAGC TGCAGTGGAG AGACCTTCT GCTCAGGC AAGTAAAGT AACTCCCA 540
ATCCCTCTCT ACTCTGTCT CATGGAGATA AAAGTGGAG AGTCTGGCT TGCCGATAG 600

CDH5-rn

Fragment of sequence NW\_047531 extracted from pos. 815988-816588 on chromosome 19.
TTCCACATCA CTGCAGATC CTCATGAAA GTACAGCTCTG TGGAGAAGCT GAGGTAGCTG 60
GGTTTCTGT TGTGTATTCT TGTGAGCTG AGAATCAAC CAGTAAGCTC CTGTTTCTGT 120
AACTGTAAAG TGGGGGATG TACTCTGCC CCGCTGGC TCCCAGGAT GGTGAACGA TCTGGCAAAC 180
GCCTAGGCTC CCCACAGCCA GCCCTAGGCT CACAGTCTCT CAGATAGAT CTGACTTGA 240
GGTATGAGTT GAATATCCAG CAGGTCGGA GGCATCCAG GGGCCAGGCT AACCCAGGCTG 300
AGGCCGCCCC ACCATAGGGC TTGCCTATCT GCAGGAGCAG TCACAAAGAA CAAATAACAG 360
GAAACCATCC GAGGGGAAGG TGGCCAGAG CAGTITGGAA AACCTGCCCT CCTCCAGGCC 420
TGGGTGTGGC TCCCCTTCC CCTCTGAGG CAATCAACAG AGCTTACAC AAGCTCAGC 480
CTCTCACAG CTGAAGAGG GATGTCCAG CTACGGACA CAGTCTAGC GGCTCACAG 540
CCTCTCTCTA CTCTGTCCC ATAGGGGCTA AAAGTGGAG CATCTGGCT CCCCATATG 600
