# Supplementary material
Source: PubMed Central journal article supplement (PMC1458633)
Supplement: pnas_0511257103_2.pdf [file pnas_0511257103_2.pdf]

**Table 2. Predicted 36 known genes that carry the promoter module**

| Gene                  | Name or description                                         | Locus           |
|-----------------------|-------------------------------------------------------------|-----------------|
| <i>AMPD2</i>          | Adenosine monophosphate deaminase 2                         | Loc271          |
| <b><i>ARHGD1B</i></b> | <b>Rho GDP dissociation inhibitor beta</b>                  | <b>Loc397</b>   |
| <i>ATP6V0D1</i>       | ATPase, H <sup>+</sup> transporting, lysosomal 38kDa, V0D1  | Loc9114         |
| <i>BSPRY</i>          | B-box and SPRY domain containing                            | Loc54836        |
| <b><i>CDH5</i></b>    | <b>Cadherin-5, type 2, VE-cadherin</b>                      | <b>Loc1003</b>  |
| <i>CHRNA1</i>         | Cholinergic receptor, nicotinic, alpha polypeptide 1        | Loc1134         |
| <i>CN2</i>            | Cytosolic nonspecific dipeptidase                           | Loc55748        |
| <i>CNN2</i>           | Calponin2                                                   | Loc1265         |
| <i>CTEN</i>           | C-terminal tensin-like                                      | Loc84951        |
| <i>E2F1</i>           | E2F transcription factor 1                                  | Loc1869         |
| <i>ELP3</i>           | Elongation protein 3 homolog                                | Loc55140        |
| <i>ESAM</i>           | Similar to endothelial cell-selective adhesion molecule     | Loc90952        |
| <i>FCGR1A</i>         | Fc fragment of IgG, high affinity Ia                        | Loc2209         |
| <i>GALK2</i>          | Galactokinase 2                                             | Loc2585         |
| <i>GRN</i>            | Granulin                                                    | Loc2896         |
| <b><i>JUNB</i></b>    | <b>Jun B proto-oncogen</b>                                  | <b>Loc3726</b>  |
| <i>KRTHA5</i>         | Keratin, hair, acid, 5                                      | Loc3886         |
| <i>LRAP</i>           | Leukocyte-derived arginine aminopeptidase                   | Loc64167        |
| <i>MAN1B1</i>         | Mannosidase, alpha, class 1B, member 1                      | Loc11253        |
| <i>MPHOSPH1</i>       | M-phase phosphoprotein 1                                    | Loc9585         |
| <i>MYD88</i>          | Myeloid differentiation primary response gene (88)          | Loc4615         |
| <i>NISCH</i>          | Nischarin                                                   | Loc11188        |
| <i>NUDT8</i>          | Nudix-type motif 8                                          | Loc254552       |
| <i>PAX5</i>           | Paired Box Gene 5                                           | Loc5079         |
| <i>PEX10</i>          | Peroxisome biogenesis factor 10                             | Loc5192         |
| <i>PPP1R9A</i>        | Protein phosphatase 1, regulatory (inhibitor) subunit 9A    | Loc55607        |
| <b><i>RAB5C</i></b>   | <b>RAB5C, member RAS oncogene family</b>                    | <b>Loc5878</b>  |
| <b><i>SEMA3A</i></b>  | <b>Semaphorin3A</b>                                         | <b>Loc10371</b> |
| <i>SLC33A1</i>        | Solute carrier family 33 (acetyl-CoA transporter), member 1 | Loc9197         |
| <i>SOX3</i>           | SRY-box 3                                                   | Loc6658         |
| <i>SPRR1B</i>         | Small proline-rich protein 1B (cornifin)                    | Loc6699         |
| <i>TBX10</i>          | T-box 10                                                    | Loc347853       |
| <b><i>TJP1</i></b>    | <b>Tight junction protein 1 [zona occludens 1 (ZO-1)]</b>   | <b>Loc7082</b>  |
| <b><i>TTN</i></b>     | <b>Titin</b>                                                | <b>Loc7273</b>  |
| <i>UBP1</i>           | Upstream-binding protein 1 (LBP-1a)                         | Loc7342         |
| <i>ULBP3</i>          | UL16 binding protein 3                                      | Loc79465        |

The described promoter model was found in 36 genes with known function by screening a human promoter library containing >50,000 predicted/verified human promoters. In several of these promoters, the model was not phylogenetically conserved or was found in alternative promoters. In addition to ZO-1, six additional genes (shown in bold) showing conservation of the predicted proximal promoter over at least two species and localized within the 500 bp upstream of the transcription start site were subsequently analyzed.
